# Supplementary material for: Intimal and medial arterial changes defined by ultra-high-frequency ultrasound: Response to changing risk factors in children with chronic kidney disease
Source: PubMed Central journal article supplement (PMC6002120; doi:10.1371/journal.pone.0198547), 2018-06-14
Supplement: pone.0198547.s001.pdf [file pone.0198547.s001.pdf]

**Supplemental Table 1 Clinical and biochemical characteristics of the study population at baseline**

| Characteristics                                                                               | Controls<br>(n = 12) | CKD 4 -5<br>(n = 19) | Dialysis<br>(n = 20) | Transplant<br>(n = 15) | p      |
|-----------------------------------------------------------------------------------------------|----------------------|----------------------|----------------------|------------------------|--------|
| <b>Clinical features – p values described between controls and patient groups</b>             |                      |                      |                      |                        |        |
| Age (years)                                                                                   | 14.0 ± 3.0           | 13.5 ± 2.7           | 13.6 ± 4.0           | 15.5 ± 2.7             | 0.62   |
| Gender (males; %)                                                                             | 4 (30)               | 14 (74)              | 8 (40)               | 10 (66)                | 0.09   |
| Ethnic group<br>(Caucasian/ Asian / black / others)                                           | 9 / 3 / 0 / 0        | 9 / 6 / 1 / 3        | 9 / 8 / 0 / 3        | 10 / 2 / 0 / 3         | 0.12   |
| Underlying diagnosis<br>CAKUT / glomerulopathy / other                                        | -                    | 13 / 3 / 3           | 11 / 4 / 5           | 9 / 2 / 3              | -      |
| Time on dialysis (years)                                                                      | -                    | -                    | 2.39 ± 2.4           | -                      | -      |
| Dialysis modality at time of study                                                            | -                    | -                    | HD 15 / PD 5         | -                      | -      |
| Time with functioning transplant (yr)                                                         | -                    | -                    | -                    | 3.67 ± 2.24            | -      |
| Body Mass Index (BMI) (kg/m <sup>2</sup> )                                                    | 19.4 ± 2.6           | 21.2 ± 3.9           | 19.1 ± 3.4           | 26.5 ± 8.7             | 0.07   |
| BMI - SDS                                                                                     | -0.04 ± 0.7          | -0.26 ± 0.8          | -0.89 ± 1.2          | 2.3 ± 1.8              | 0.03   |
| Systolic BP (mmHg)                                                                            | 101 ± 6.6            | 110 ± 7.4            | 117 ± 10.7           | 122 ± 31               | 0.02   |
| SDS                                                                                           | -0.06 ± 0.5          | 0.85 ± 1.1           | 2.38 ± 1.0           | 2.48 ± 2.3             | 0.02   |
| Diastolic BP (mmHg)                                                                           | 63 ± 5.6             | 66 ± 9.5             | 73 ± 10              | 66.8 ± 9               | 0.08   |
| SDS                                                                                           | -0.11 ± 0.43         | 0.62 ± 1.0           | 1.64 ± 0.7           | 1.53 ± 1.1             | 0.02   |
| 24-hour mean arterial pressure (mmHg)                                                         | -                    | 86 ± 9.7             | 92.9 ± 13.4          | 102 ± 15.7             | 0.01   |
| SDS                                                                                           | -                    | 0.71 ± 1.0           | 1.83 ± 1.2           | 2.22 ± 1.3             | 0.01   |
| Number of children on anti-hypertensive medications                                           | 0                    | 4                    | 3                    | 9                      | 0.001  |
| Number of anti-hypertensive agents (median, range)                                            | 0                    | 0<br>(0 – 2)         | 1<br>(0 – 2)         | 2<br>(0 – 2)           | -      |
| <b>Biochemical measures – p values described between CKD and dialysis vs transplant group</b> |                      |                      |                      |                        |        |
| Estimated GFR (ml/min/1.73m <sup>2</sup> )                                                    | -                    | 9.63 ± 4.9           | -                    | 68.8 ± 22.3            | -      |
| Calcium (albumin adjusted; mMol/L)                                                            | -                    | 2.36 ± 0.03          | 2.44 ± 0.18          | 2.32 ± 0.28            | 0.71   |
| Phosphate (mMol/L)                                                                            | -                    | 1.43 ± 0.44          | 1.76 ± 0.97          | 1.13 ± 0.28            | 0.02   |
| Parathyroid hormone (pMol/L)                                                                  | -                    | 4.7<br>(0.2 – 14.1)  | 19.8<br>(3.7 – 67.5) | 3.0<br>(0.8 – 20.7)    | 0.01   |
| Albumin (g/L)                                                                                 | -                    | 43 ± 3.2             | 39.8 ± 4.1           | 41.7 ± 3.8             | 0.84   |
| Fibroblast growth factor 23<br>(RU/ml)                                                        | -                    | 237<br>(121 – 476)   | 1268<br>(566 – 1392) | 53<br>(29 – 119)       | <0.001 |
| soluble-klotho (pg/mL)                                                                        | -                    | 1088<br>(462 – 1638) | 921<br>(322 – 1341)  | 1729<br>(1131 – 2011)  | 0.04   |
| 25-hydroxyvitamin D (nMol/L)                                                                  | -                    | 46 ± 27.4            | 58 ± 31.8            | 31 ± 50.4              | 0.08   |
| High sensitivity CRP (mg/L)                                                                   | -                    | 1.23 ± 0.24          | 3.11 ± 4.61          | 1.26 ± 0.20            | 0.06   |
| Cholesterol                                                                                   | -                    |                      |                      |                        |        |
| Total (mg/dl)                                                                                 |                      | 190 ± 36             | 174 ± 41             | 220 ± 52               | 0.11   |
| HDL (mg/dl)                                                                                   |                      | 41 ± 5.1             | 40 ± 8.7             | 46 ± 6.7               | 0.72   |
| LDL (mg/dl)                                                                                   |                      | 153 ± 27             | 156 ± 37             | 144 ± 20               | 0.65   |
| Triglycerides (mg/dl)                                                                         |                      | 123 ± 24             | 117 ± 28             | 141 ± 39               | 0.26   |

All data are described as mean ± standard deviation or median (range) where appropriate

SDS – standard deviation score

CAKUT – congenital anomalies of the kidney and urinary tract

HD – hemodialysis; PD – peritoneal dialysis

p values are for comparison across groups as indicated; obtained from ANOVA or Kruskal-Wallis
