# Supplementary material for: Intimal and medial arterial changes defined by ultra-high-frequency ultrasound: Response to changing risk factors in children with chronic kidney disease
Source: PubMed Central journal article supplement (PMC6002120; doi:10.1371/journal.pone.0198547), 2018-06-14
Supplement: pone.0198547.s002.pdf [file pone.0198547.s002.pdf]

**Supplemental Table 2 Vascular measures at baseline and 1 year follow-up in CKD and transplanted patients**

| Vascular measures             | CKD ( n = 16) |                |         | Transplant ( n = 15) |                |         |
|-------------------------------|---------------|----------------|---------|----------------------|----------------|---------|
|                               | Baseline      | 1 yr follow-up | p-value | Baseline             | 1 yr follow-up | p-value |
| Conventional cIMT (mm)        | 0.400 ± 0.02  | 0.44 ± 0.04    | 0.13    | 0.45 ± 0.028         | 0.45 ± 0.04    | 0.73    |
| cIMT SDS                      | 1.18 ± 0.84   | 1.37 ± 0.61    | 0.29    | 1.88 ± 0.60          | 1.84 ± 0.71    | 0.11    |
| Carotid IMT – 55 MHz (mm)     | 0.388 ± 0.13  | 0.36 ± 0.06    | 0.19    | 0.363 ± 0.037        | 0.357 ± 0.06   | 0.49    |
| Carotid IT – 55 MHz (mm)      | 0.083 ± 0.015 | 0.075 ± 0.003  | 0.46    | 0.078 ± 0.010        | 0.085 ± 0.011  | 0.06    |
| Carotid MT – 55 MHz (mm)      | 0.298 ± 0.02  | 0.271 ± 0.058  | 0.38    | 0.293 ± 0.018        | 0.245 ± 0.025  | 0.01    |
| Dorsal pedal IMT– 70 MHz (mm) | 0.137 ± 0.018 | 0.135 ± 0.024  | 0.58    | 0.134 ± 0.030        | 0.151 ± 0.043  | 0.33    |
| Dorsal pedal IT – 70 MHz (mm) | 0.061 ± 0.009 | 0.065 ± 0.007  | 0.32    | 0.058 ± 0.010        | 0.068 ± 0.011  | 0.04    |
| Dorsal pedal MT – 70 MHz (mm) | 0.086 ± 0.018 | 0.077 ± 0.022  | 0.56    | 0.076 ± 0.029        | 0.086 ± 0.042  | 0.45    |

IMT – intima – media thickness; IT – intimal thickness; MT – medial thickness; cIMT – carotid IMT; SDS – standard deviation score; p-value between baseline and follow-up by paired t-test
